# Supplementary material
Source: PubMed Central journal article supplement (PMC4492668)
Supplement: Supp_Table1.pdf [file Supp_Table1.pdf]

## Supplementary Data

SUPPLEMENTARY TABLE S1. EFFECT OF THE INITIAL PATIENT AGE ON OVERALL SURVIVAL

| <i>Treatment</i>      | <i>Age (years)</i> | <i>Survival (days)</i> |            |              | <i>p &lt;</i>     |                        |                    |           |            |
|-----------------------|--------------------|------------------------|------------|--------------|-------------------|------------------------|--------------------|-----------|------------|
|                       |                    |                        |            |              | <i>ST vs. CT</i>  |                        | <i>(y) vs. (o)</i> |           |            |
|                       |                    | <i>DM</i>              | <i>DAC</i> | <i>Range</i> | <i>DM vs. DAC</i> | <i>DM</i>              | <i>DAC</i>         | <i>DM</i> | <i>DAC</i> |
| PS-ST ( <i>n</i> =10) | 4–10 (y)           | 71                     | 67.5       | 33–129       | NS                | 0.0001                 | 0.0001             | NS        | NS         |
| PS-ST ( <i>n</i> =32) | 11–17 (o)          | 78                     | 78         | 29–206       | NS                | 0.0001                 | 0.0001             |           |            |
| CS-ST ( <i>n</i> =40) | 1–10 (y)           | 121                    | 117        | 12–568       | NS                | 0.0001                 | 0.0001             | NS        | NS         |
| CS-ST ( <i>n</i> =53) | 11–18 (o)          | 95                     | 78         | 11–540       | NS                | 0.0001                 | 0.0001             |           |            |
|                       |                    |                        |            |              |                   | <i>PS-CT vs. CS-CT</i> |                    |           |            |
| PS-CT ( <i>n</i> =34) | 3–10 (y)           | 474                    | 405        | 99–592       | NS                | —                      | —                  | NS        | NS         |
| PS-CT ( <i>n</i> =58) | 11–18 (o)          | 304                    | 295        | 46–1321      | NS                | —                      | —                  |           |            |
| CS-CT ( <i>n</i> =98) | 2–10 (y)           | >1880                  | 788        | 163–1880     | 0.0001            | 0.0001                 | 0.0001             | 0.009     | 0.0005     |
| CS-CT ( <i>n</i> =93) | 11–18 (o)          | 730                    | 484        | 99–2251      | 0.0002            | 0.0001                 | 0.002              |           |            |

CT, combined treatment; CS, complete surgery; NS, no significant; PS, partial surgery; ST, only surgery treatment; (y), younger patients; (o), older patients.

Overall survival because of any cause (DAC): all deceased patients were censored as event for Kaplan–Meier analysis. Overall survival because of melanoma (DM): patients that died because of causes unrelated to melanoma progression were censored as alive (no event) the day of death. *p*-Values were calculated by log-rank test for Kaplan–Meier analysis.
